# Supplementary material for: 8-Oxoguanine Affects DNA Backbone Conformation in the EcoRI Recognition Site and Inhibits Its Cleavage by the Enzyme
Source: PubMed Central journal article supplement (PMC5066940; doi:10.1371/journal.pone.0164424), 2016-10-17
Supplement: pone.0164424.s009.pdf [file pone.0164424.s009.pdf]

**S1 Table. Tolerances applied to NOE distance restraints in structure calculations.**

| <b>Distance Category</b> | <b>oxoG4 Tolerance (Å)</b> | <b>oxoG10 Tolerance (Å)</b> |
|--------------------------|----------------------------|-----------------------------|
| Short ( < 3 Å )          | 0.50                       | 0.45                        |
| Medium ( 3 Å < x < 5 Å ) | 0.70                       | 0.65                        |
| Long ( > 5 Å )           | 0.90                       | 0.85                        |
| Methyl-Containing        | 1.8 Å                      | 1.8 Å                       |
