# Supplementary material for: 8-Oxoguanine Affects DNA Backbone Conformation in the EcoRI Recognition Site and Inhibits Its Cleavage by the Enzyme
Source: PubMed Central journal article supplement (PMC5066940; doi:10.1371/journal.pone.0164424), 2016-10-17
Supplement: pone.0164424.s010.pdf [file pone.0164424.s010.pdf]

**S2 Table. Hydrogen bonds observed in the GAATTC site during molecular dynamics simulation of *EcoRI* in a complex with DNA containing G or oxoG at the 1<sup>st</sup> position of the recognition sequence\***

| Donor                    | Acceptor                   | G                |                       |               | oxoG           |                       |               |
|--------------------------|----------------------------|------------------|-----------------------|---------------|----------------|-----------------------|---------------|
|                          |                            | Mean length, Å   | Mean energy, kcal/mol | Occurrence, % | Mean length, Å | Mean energy, kcal/mol | Occurrence, % |
| Protein–DNA bonds        |                            |                  |                       |               |                |                       |               |
| N[Lys73]                 | O1P[G/oxoG1]               | 3.02             | –2.26                 | 99            | 2.98           | –2.36                 | 99            |
|                          |                            | 3.01             | –2.36                 | 99            | 2.95           | –2.35                 | 99            |
| Nζ[Lys97]                | O1P[A2]                    | 3.07             | –2.27                 | 96            | 3.01           | –2.35                 | 99            |
|                          |                            | 3.04             | –2.30                 | 64            | 3.06           | –2.31                 | 98            |
| N[His98]                 | O1P[A3]                    | 3.04             | –2.31                 | 92            | 3.09           | –2.23                 | 86            |
|                          |                            | 3.06             | –2.28                 | 82            | 3.08           | –2.23                 | 78            |
| N[Gly100]                | O2P[T4]                    | 3.11             | –2.27                 | 99            | 3.09           | –2.29                 | 99            |
|                          |                            | 3.08             | –2.25                 | 98            | 3.07           | –2.29                 | 99            |
| N[Asn125]                | O <sup>4</sup> [T4]        | 3.13             | –2.20                 | 99            | 3.10           | –2.24                 | 99            |
|                          |                            | 3.07             | –2.24                 | 99            | 3.08           | –2.24                 | 99            |
| Nδ2[Asn125]              | N7[A2]                     | 3.15             | –1.69                 | 73            | 3.14           | –1.72                 | 81            |
|                          |                            | 3.15             | –1.66                 | 85            | 3.12           | –1.80                 | 97            |
| N[Ala126]                | O <sup>4</sup> [T4]        | 3.05             | –2.15                 | 96            | 3.06           | –2.15                 | 96            |
|                          |                            | 3.05             | –2.12                 | 90            | 3.06           | –2.14                 | 94            |
| Nη2[Arg129]              | O2P[A2]                    | 3.07             | –1.94                 | 2             | 3.07           | –2.12                 | 62            |
|                          |                            | 3.08             | –2.18                 | 85            | 3.06           | –2.29                 | 98            |
| Nζ[Lys132]               | O2P[G/oxoG1]               | 3.05             | –2.27                 | 93            | 3.14           | –2.14                 | 44            |
|                          |                            | 3.03             | –2.16                 | 7             | 3.05           | –2.20                 | 80            |
| Nη1[Arg187]              | O <sup>8</sup> [oxoG1]     | n/a <sup>#</sup> | n/a                   | n/a           | 2.99           | –2.33                 | 99            |
|                          |                            |                  |                       |               | 3.06           | –2.29                 | 99            |
| N <sup>6</sup> [A2]      | Oδ1[Asn125]                | 2.95             | –2.36                 | 99            | 3.01           | –2.34                 | 99            |
|                          |                            | 3.00             | –2.33                 | 99            | 3.03           | –2.31                 | 99            |
| N <sup>4</sup> [C6]      | O[Ala122]                  | 3.02             | –2.29                 | 99            | 3.04           | –2.30                 | 99            |
|                          |                            | 3.04             | –2.34                 | 99            | 3.04           | –2.39                 | 99            |
| Watson–Crick bonds       |                            |                  |                       |               |                |                       |               |
| N1[G/oxoG1]              | N3[C(6)]                   | 3.11             | –1.92                 | 99            | 3.06           | –1.87                 | 98            |
|                          |                            | 3.05             | –1.91                 | 99            | 3.05           | –1.86                 | 98            |
| N <sup>2</sup> [G/oxoG1] | O <sup>2</sup> [C(6)]      | 2.98             | –2.33                 | 99            | 3.02           | –2.38                 | 99            |
|                          |                            | 2.99             | –2.39                 | 100           | 2.98           | –2.39                 | 100           |
| N <sup>6</sup> [A2]      | O <sup>4</sup> [T(5)]      | 2.93             | –2.40                 | 99            | 2.95           | –2.40                 | 99            |
|                          |                            | 2.95             | –2.39                 | 99            | 2.97           | –2.39                 | 99            |
| N <sup>6</sup> [A3]      | O <sup>4</sup> [T(4)]      | 3.07             | –2.31                 | 99            | 3.06           | –2.30                 | 99            |
|                          |                            | 3.12             | –2.23                 | 99            | 3.07           | –2.27                 | 99            |
| N3[T4]                   | N1[A(3)]                   | 3.12             | –1.87                 | 99            | 3.17           | –1.82                 | 99            |
|                          |                            | 3.08             | –1.88                 | 99            | 3.13           | –1.85                 | 99            |
| N3[T5]                   | N1[A(2)]                   | 3.13             | –1.87                 | 99            | 3.12           | –1.86                 | 99            |
|                          |                            | 3.14             | –1.86                 | 99            | 3.14           | –1.85                 | 99            |
| N <sup>4</sup> [C6]      | O <sup>6</sup> [G/oxoG(1)] | 3.05             | –2.35                 | 99            | 2.96           | –2.39                 | 99            |
|                          |                            | 2.95             | –2.40                 | 100           | 2.97           | –2.38                 | 99            |

\*The bonds existing in at least one of two half-sites for at least 90% of the simulation are listed. The values for both half-sites are presented. Indexes in parenthesis refer to the complementary bases.

<sup>#</sup>n/a, not applied
